# Supplementary material for: In Vitro Imaging and Molecular Characterization of Ca2+ Flux Modulation by Nanosecond Pulsed Electric Fields
Source: MDPI journal article supplement (doi:10.3390/ijms242115616), 2023-10-26
Supplement: s1 [file s1]

# In Vitro Imaging and Molecular Characterization of Ca<sup>2+</sup> Flux Modulation by Nanosecond Pulsed Electric Fields

Francesca Camera <sup>1,†</sup>, Eleonora Colantoni <sup>1,†</sup>, Tomas Garcia-Sanchez <sup>2</sup>, Barbara Benassi <sup>1</sup>, Claudia Consales <sup>1</sup>, Adeline Muscat <sup>3</sup>, Leslie Vallet <sup>3</sup>, Luis M. Mir <sup>3</sup>, Franck Andre <sup>3</sup> and Caterina Merla <sup>1,\*</sup>

<sup>1</sup> Division of Health Protection Technologies, Italian National Agency for Energy, New Technologies and Sustainable Economic Development (ENEA), 00123 Rome, Italy; francesca.camera@enea.it (F.C.); eleonora.colantoni@enea.it (E.C.); barbara.benassi@enea.it (B.B.); claudia.consales@enea.it (C.C.)

<sup>2</sup> Department of Information and Communication Technologies, Universitat Pompeu Fabra, 08002 Barcellona, Spain; tomas.garcia@upf.edu

<sup>3</sup> CNRS, Metabolic and Systemic Aspects of the Oncogenesis, (METSYS), Université Paris-Saclay, Institut Gustave Roussy, 94805 Villejuif, France; adeline.muscat@gustaveroussy.fr (A.M.); leslie.vallet@gustaveroussy.fr (L.V.); luis.mir@cnrs.fr (L.M.M.); franck.andre@cnrs.fr (F.A.)

\* Correspondence: caterina.merla@enea.it; Tel.: +39-0630484616

† These authors equally contributed to the work.

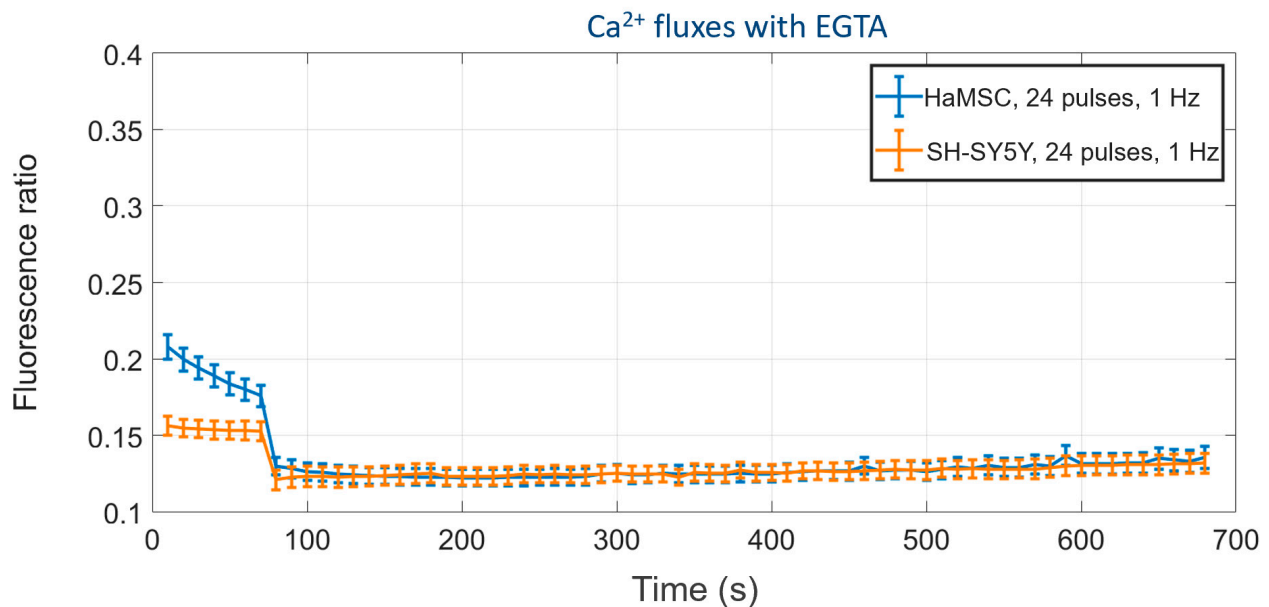

**Figure S1.** Ca<sup>2+</sup> fluxes in HaMSC and SH-SY5Y cells in presence of EGTA in the extracellular medium. Fluorescence ratio of FURA-2-AM dye measured by time-lapse before and after pulses delivery using for both cells the same protocol: 24 pulses at 1 Hz delivered consecutively ( $p < 0.05$ ). Acquisition for 11 minutes, 1 image each 10 seconds. The lack of calcium uptake when Ca<sup>2+</sup> was absent in the extracellular medium indicates that mitochondrial membranes are not affected by the short electric pulses.

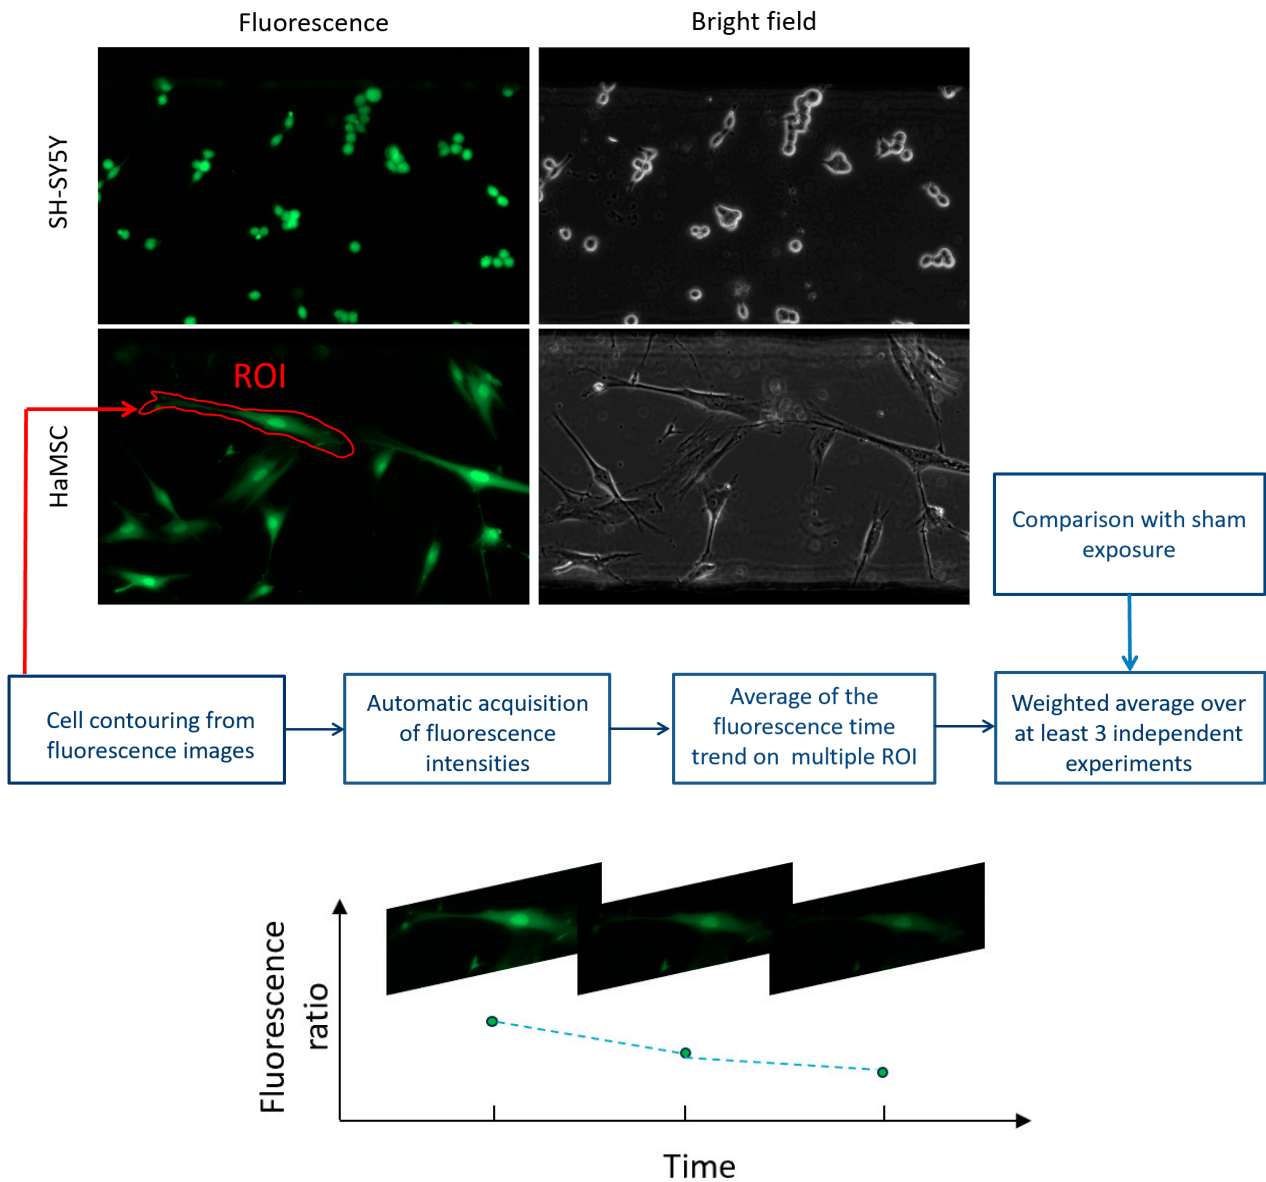

**Figure S2.** Block diagram of  $\text{Ca}^{2+}$  fluxes analysis and cell images (fluorescence and bright fields). This is an example of a fluorescence image acquired, in which the green intensity is correlated with the effective calcium concentrations present within the cells. In the images, the following steps were performed: 1) Cells were manually outlined to define a Region Of Interest (ROI); 2) The green intensity in that ROI was automatically acquired and tracked over time; 3) The fluxes obtained from each ROI were averaged, and 4) A further weighted average was calculated over at least 3 independent experiments performed under the same exposure conditions. In the insert on the right, the time trend of the fluorescence ratio for a HaMSC cell is presented; these cells have an average radius dimension of around  $36 \mu\text{m}$ . In the insert on the left, the time trend of the fluorescence ratio for a SH-SY5Y cell is shown; these cells have an average radius dimension of around  $12 \mu\text{m}$ .
